# Supplementary material
Source: publisher figshare collection journal article supplement (https://tandf.figshare.com/articles/dataset/_/1588583)
Supplement: Supplementary file 3 [file 2]

Supplemental Means Table

| /b/     |    |         |          | /p/     |    |         |          | /d/     |    |         |          | /t/     |    |         |          |
|---------|----|---------|----------|---------|----|---------|----------|---------|----|---------|----------|---------|----|---------|----------|
| session | n  | mean    | std      |
| 1       | 18 | 14.0883 | 8.2098   | 1       | 14 | 13.185  | 8.8116   | 1       | 22 | 12.7723 | 8.3008   | 1       | 17 | 26.2071 | 36.4622  |
| 2       | 13 | 16.3708 | 12.6459  | 2       | 16 | 19.6313 | 12.9327  | 2       | 20 | 18.158  | 7.2811   | 2       | 15 | 17.8187 | 11.9377  |
| 3       | 22 | 15.3714 | 11.9628  | 3       | 22 | 14.8864 | 39.9288  | 3       | 18 | 17.7933 | 12.6576  | 3       | 21 | 17.0919 | 10.2555  |
| 4       | 14 | 13.5443 | 17.4663  | 4       | 19 | 19.3153 | 10.6696  | 4       | 15 | 21.2933 | 10.1987  | 4       | 15 | 15.1267 | 7.3492   |
| 5       | 20 | 19.49   | 14.0115  | 5       | 21 | 40.0381 | 25.9383  | 5       | 18 | 24.7706 | 7.8747   | 5       | 21 | 31.0024 | 25.733   |
| 6       | 18 | 5.3878  | 23.4979  | 6       | 21 | 60.971  | 35.9698  | 6       | 17 | 12.4659 | 6.1184   | 6       | 20 | 36.8315 | 25.0459  |
| 7       | 21 | 1.5552  | 22.9666  | 7       | 19 | 99.3358 | 24.6864  | 7       | 21 | 12.0943 | 3.9299   | 7       | 20 | 99.577  | 44.3942  |
| 8       | 22 | 7.2186  | 9.5624   | 8       | 20 | 91.2275 | 22.2529  | 8       | 21 | 8.9371  | 3.4112   | 8       | 19 | 86.37   | 38.7002  |
| 9       | 14 | 12.8336 | 9.53500  | 9       | 18 | 82.32   | 28.21825 | 9       | 14 | 12.8336 | 5.61741  | 9       | 19 | 78.3126 | 23.75609 |
| 10      | 20 | 15.6920 | 9.02119  | 10      | 20 | 82.4253 | 21.32596 | 10      | 20 | 18.876  | 17.49415 | 10      | 16 | 81.295  | 27.63477 |
| 11      | 17 | 11.4406 | 2.90048  | 11      | 19 | 52.9563 | 15.25102 | 11      | 17 | 11.7194 | 2.78216  | 11      | 15 | 58.8653 | 34.52295 |
| 12      | 21 | 14.6090 | 5.70500  | 12      | 20 | 90.446  | 22.74114 | 12      | 21 | 18.4348 | 7.06148  | 12      | 21 | 73.1267 | 17.98578 |
| 13      | 24 | 17.3378 | 6.02764  | 13      | 22 | 67.3173 | 26.73538 | 13      | 24 | 17.8479 | 3.02314  | 13      | 29 | 62.1445 | 27.38602 |
| 14      | 25 | 24.4913 | 26.28844 | 14      | 24 | 69.9038 | 19.15298 | 14      | 25 | 12.968  | 5.48677  | 14      | 27 | 66.4267 | 33.48433 |
| 15      | 18 | 14.5079 | 8.43349  | 15      | 21 | 68.5053 | 27.49857 | 15      | 18 | 11.0517 | 3.21592  | 15      | 25 | 62.9904 | 23.95648 |
| 16      | 24 | 22.2971 | 6.98895  | 16      | 22 | 81.1295 | 22.00121 | 16      | 24 | 20.3525 | 6.57315  | 16      | 14 | 77.6964 | 25.21522 |
| 17      | 25 | 15.6920 | 9.02119  | 17      | 17 | 69.8559 | 18.29273 | 17      | 25 | 20.4872 | 8.46924  | 17      | 21 | 68.8229 | 21.19668 |
| 18      | 23 | 19.6823 | 23.93366 | 18      | 20 | 85.602  | 19.91153 | 18      | 23 | 30.5091 | 10.78766 | 18      | 21 | 90.4014 | 22.09006 |
| 19      | 19 | 13.8806 | 4.96475  | 19      | 19 | 75.9058 | 26.39917 | 19      | 19 | 24.5079 | 12.85081 | 19      | 22 | 73.3455 | 27.77514 |
| 20      | 25 | 21.0004 | 8.12934  | 20      | 20 | 90.0045 | 23.00286 | 20      | 25 | 25.0888 | 5.99859  | 20      | 19 | 92.3158 | 22.31909 |
| 21      | 23 | 11.8561 | 15.62220 | 21      | 20 | 54.8385 | 17.95472 | 21      | 23 | 12.3758 | 19.97642 | 21      | 21 | 44.2995 | 15.61528 |
| 22      | 20 | 11.9093 | 7.78476  | 22      | 21 | 68.0567 | 21.79674 | 22      | 20 | 14.8145 | 6.65334  | 22      | 25 | 63.2052 | 27.10061 |
| 23      | 15 | 9.3513  | 2.65322  | 23      | 32 | 60.8788 | 22.92932 | 23      | 15 | 14.9287 | 5.21872  | 23      | 24 | 45.2538 | 28.54143 |
| 24      | 21 | 16.9965 | 15.63809 | 24      | 22 | 62.4323 | 15.90028 | 24      | 21 | 16.8333 | 5.44792  | 24      | 22 | 59.4923 | 21.73432 |
| 25      | 18 | 14.5552 | 8.58217  | 25      | 18 | 67.86   | 13.26181 | 25      | 18 | 13.6656 | 6.44593  | 25      | 26 | 54.6492 | 18.96589 |
