# Supplementary material
Source: publisher figshare collection journal article supplement (https://tandf.figshare.com/articles/dataset/_/1588583)

# Supplemental Histograms

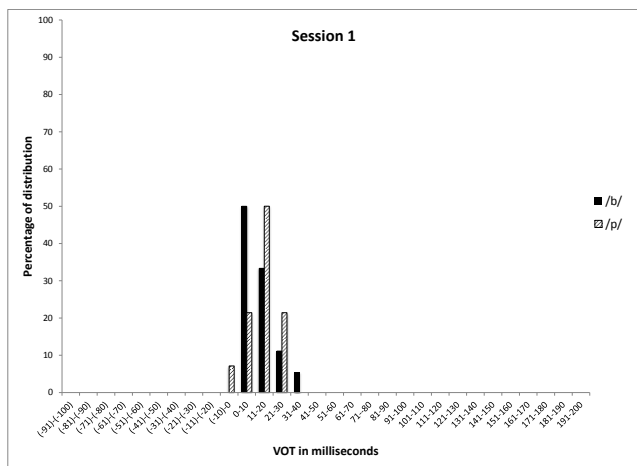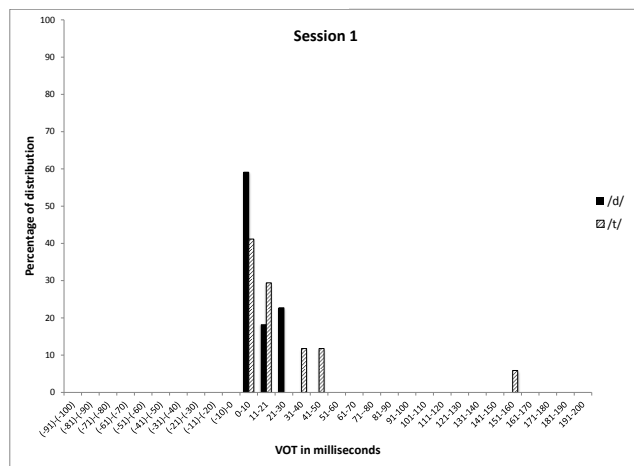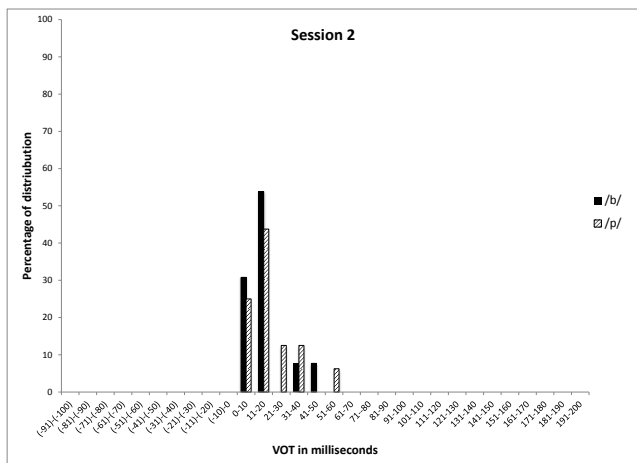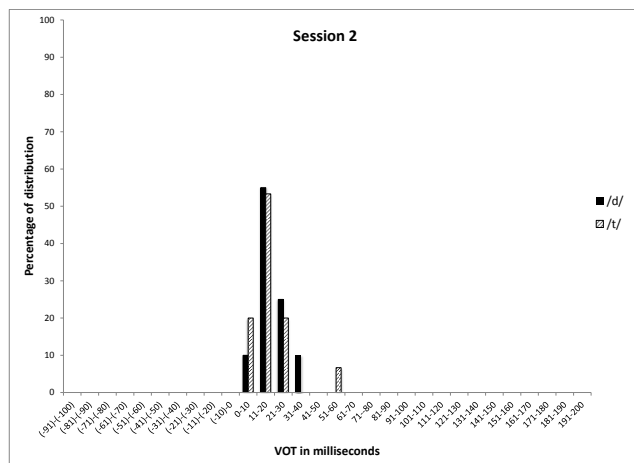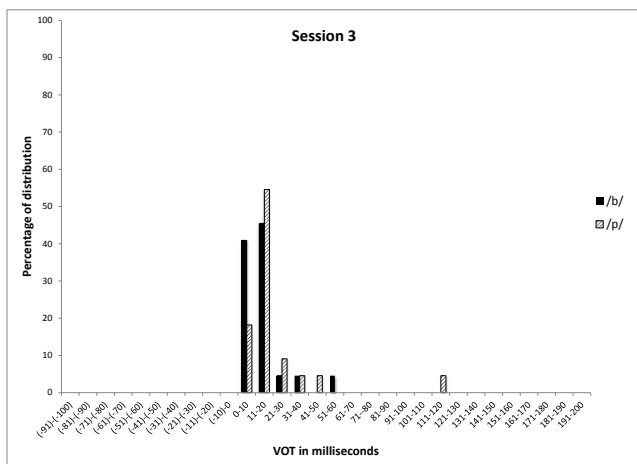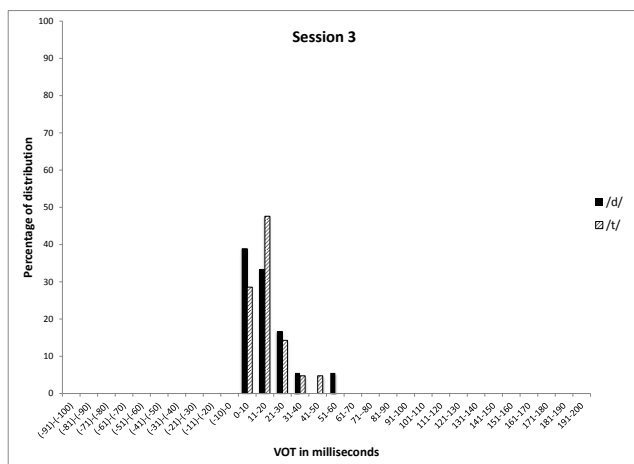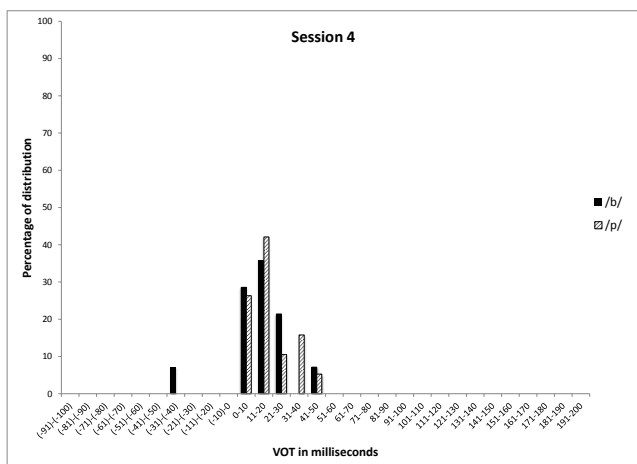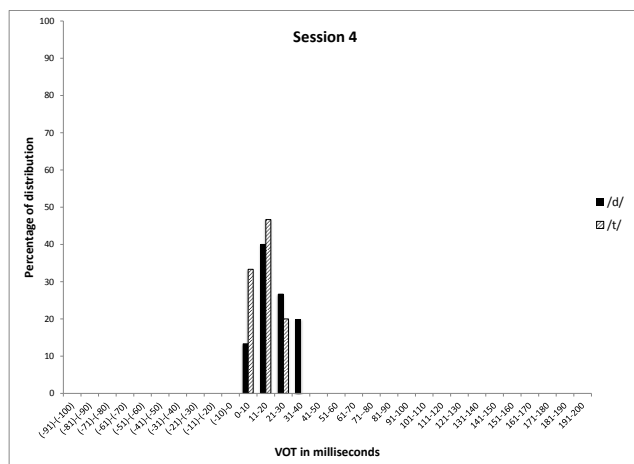

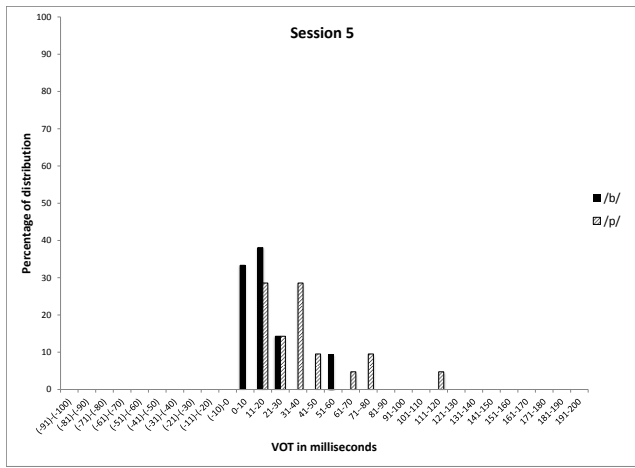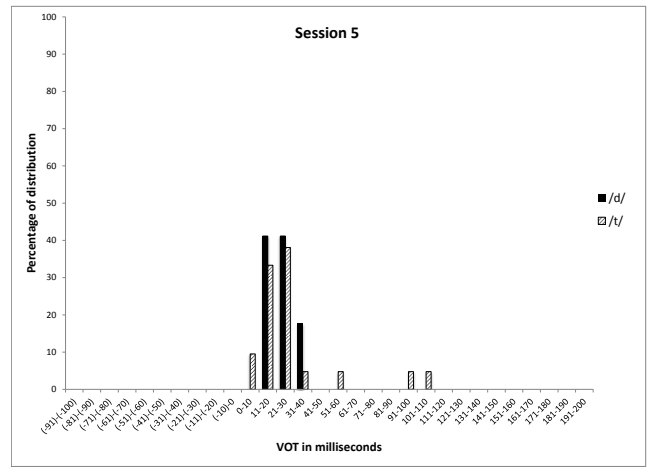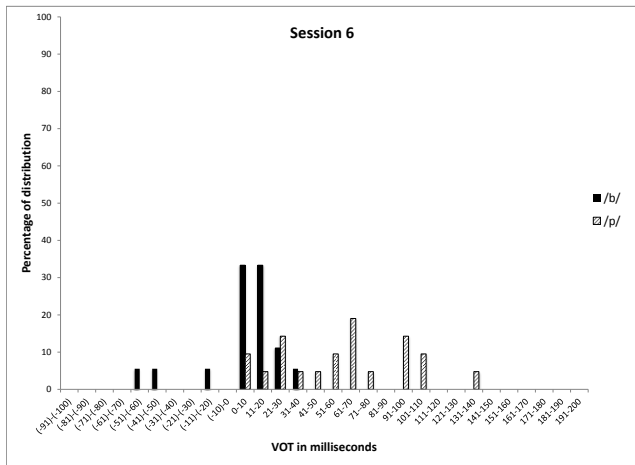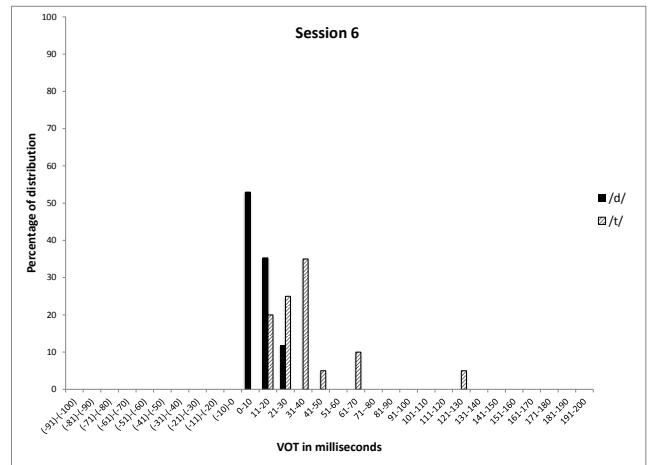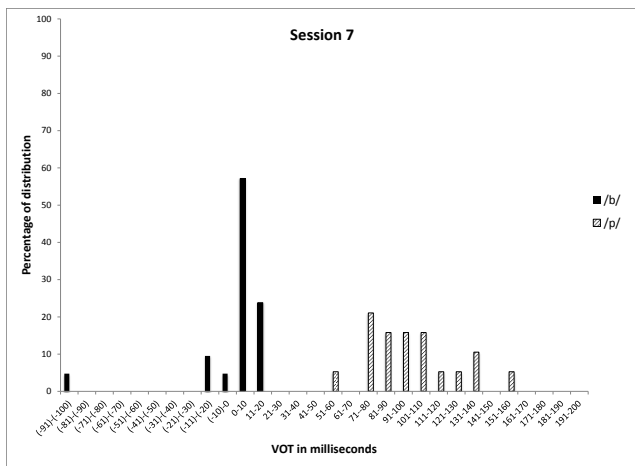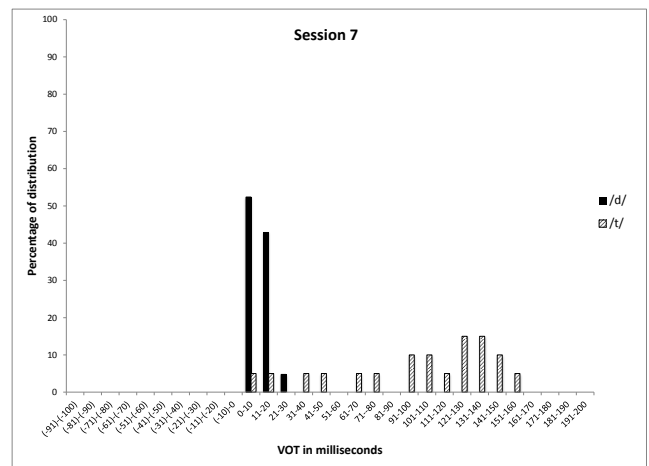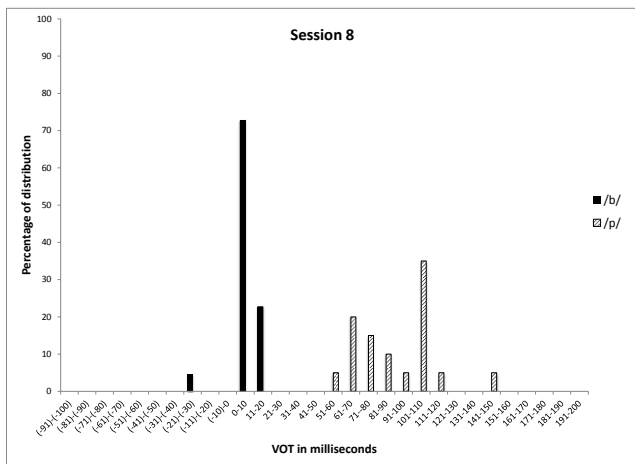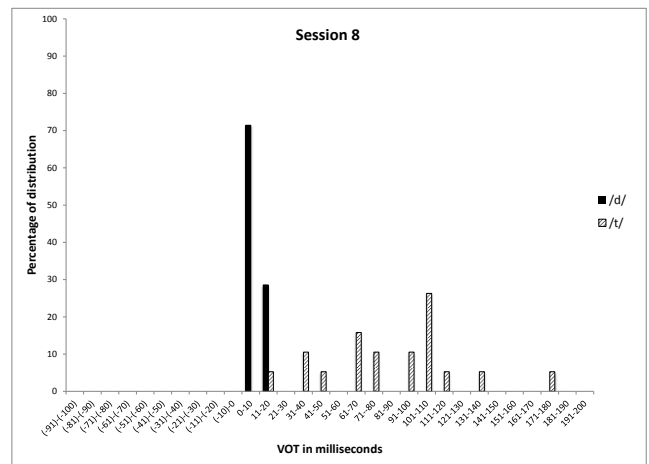

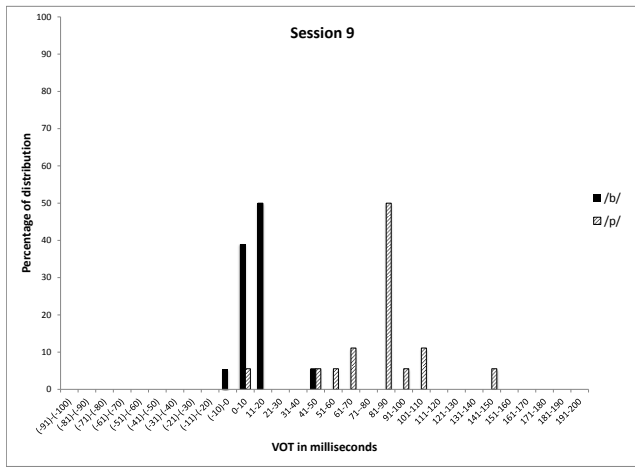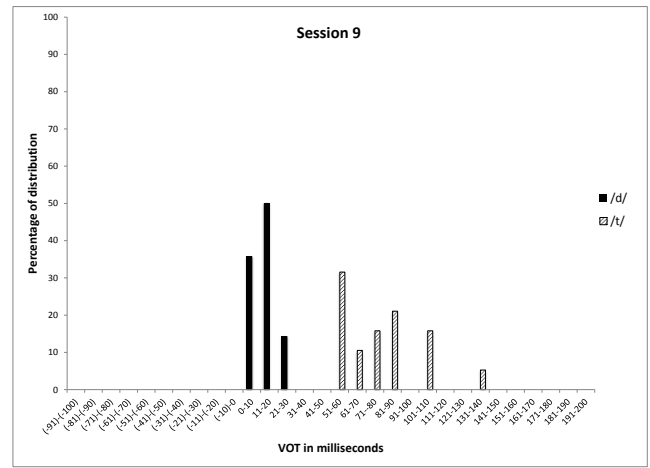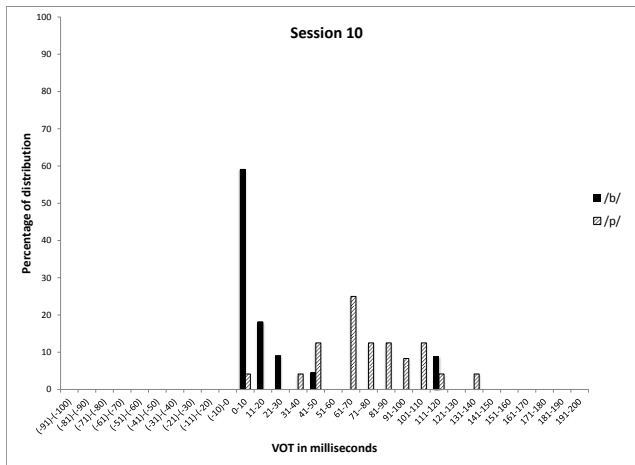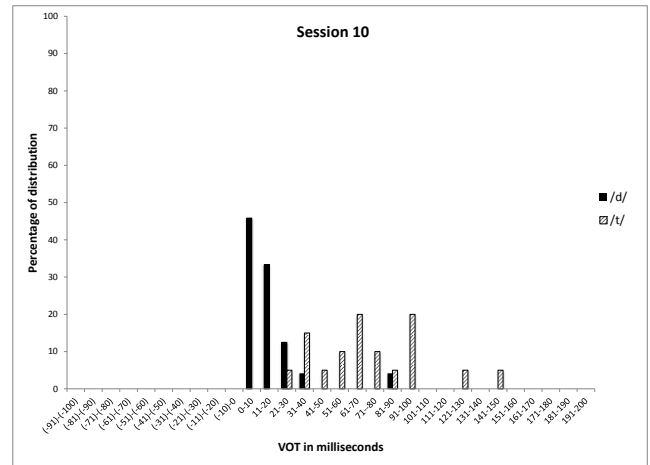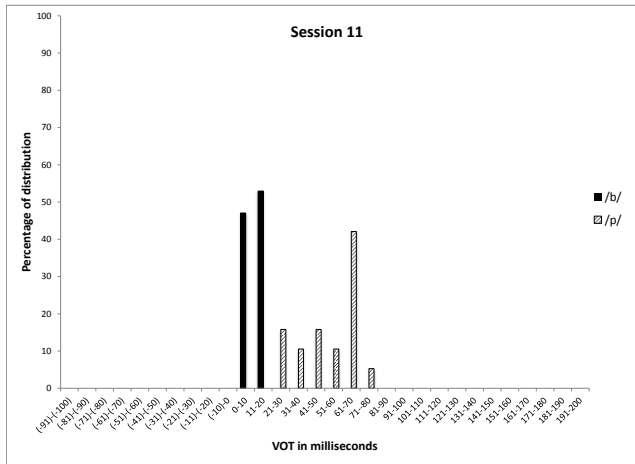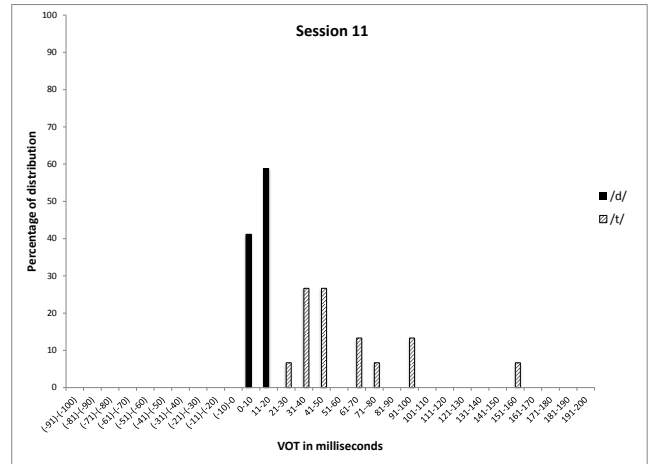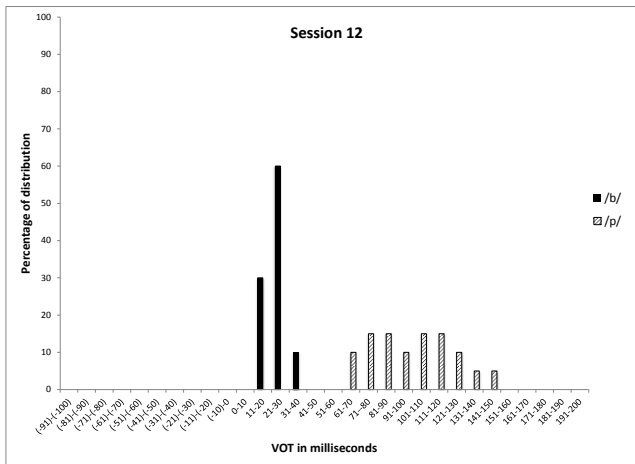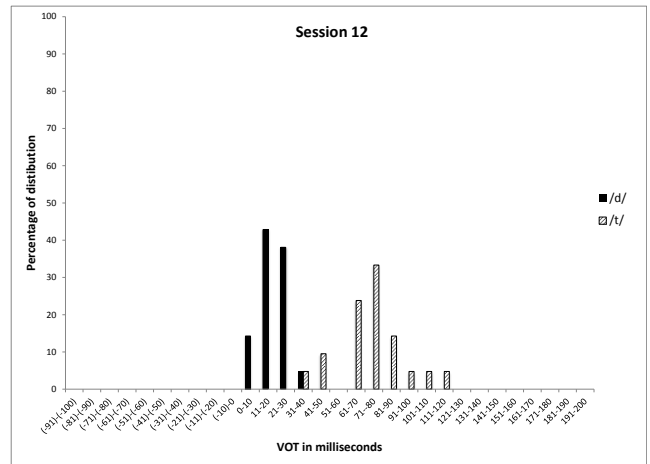

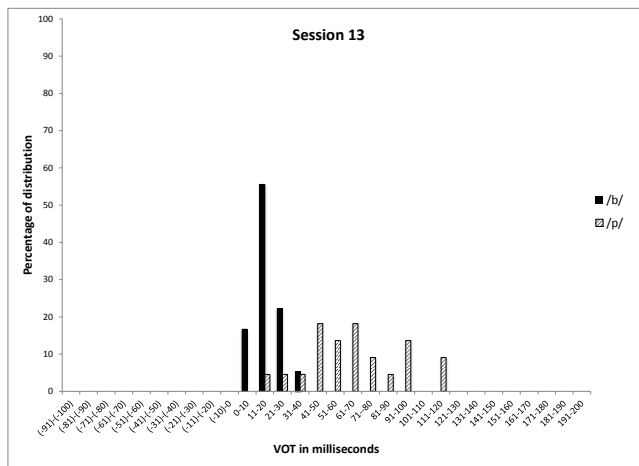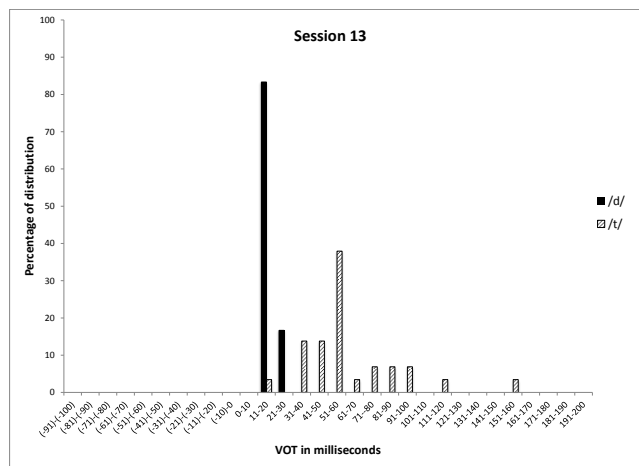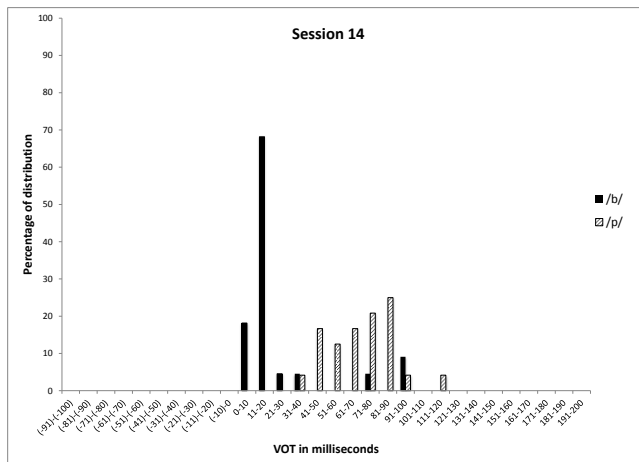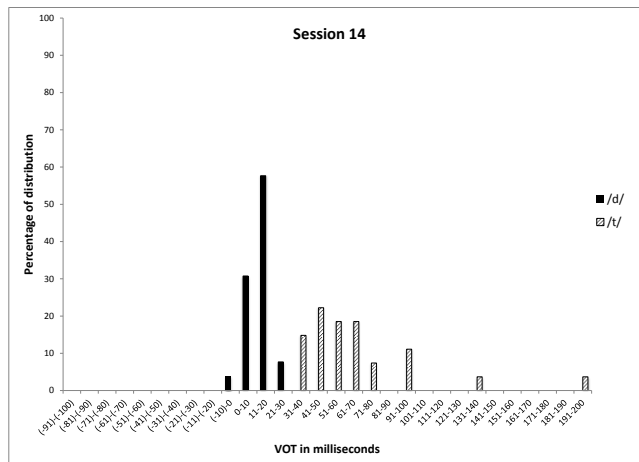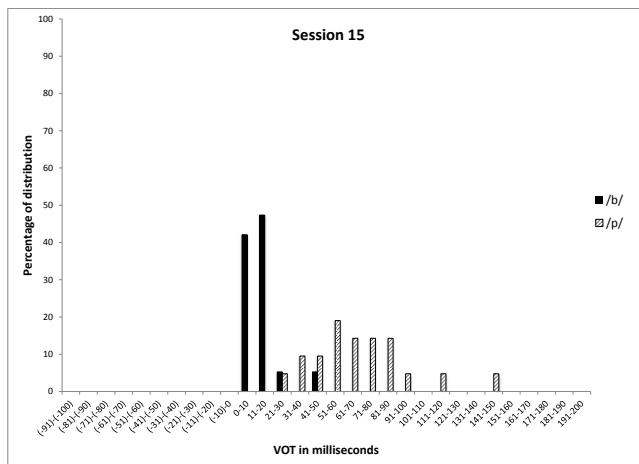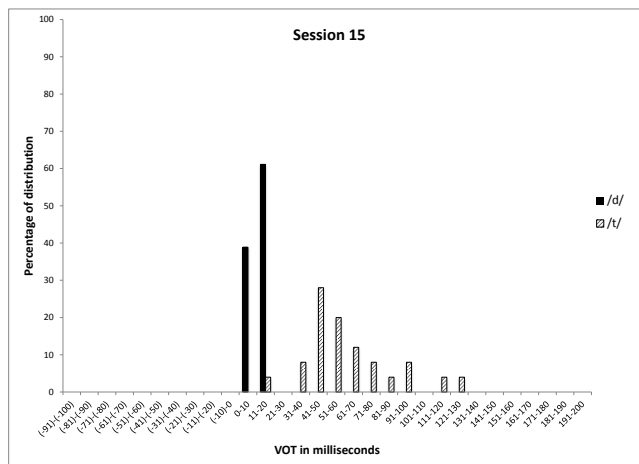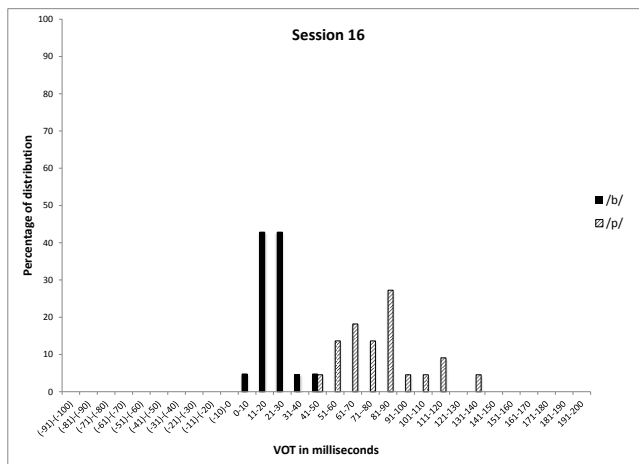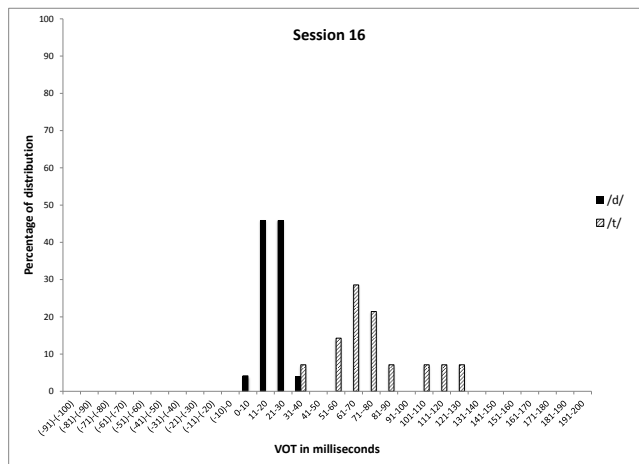

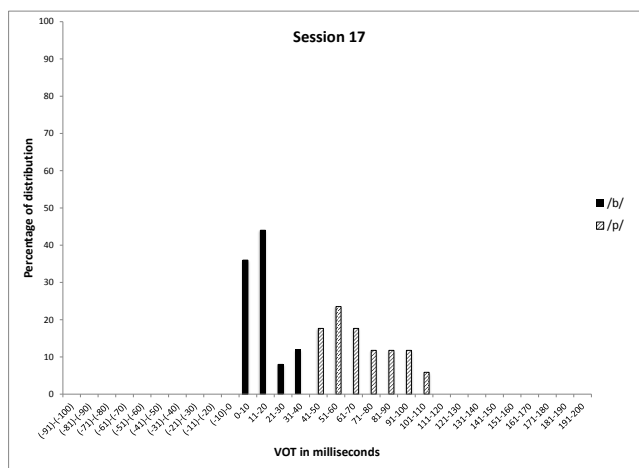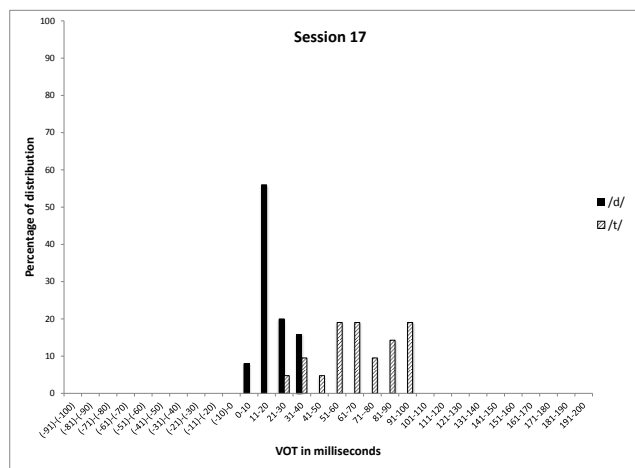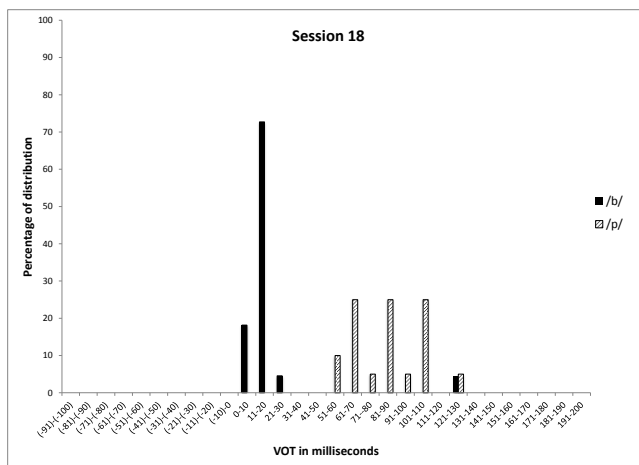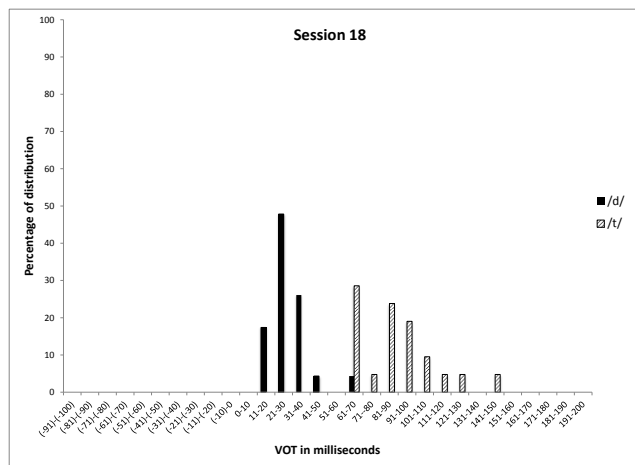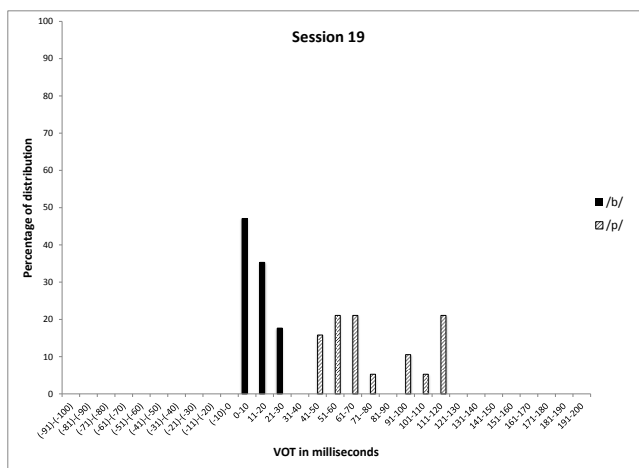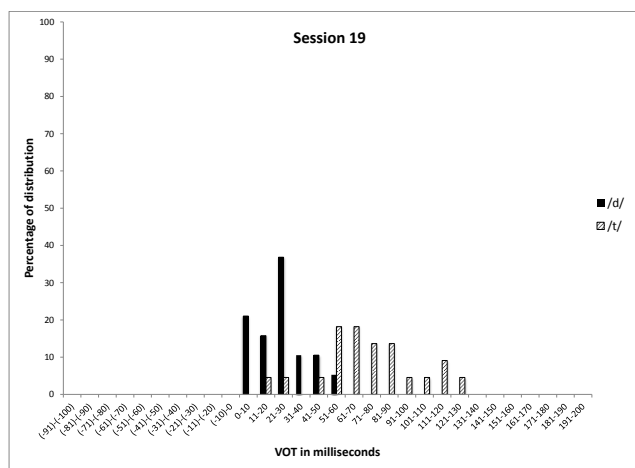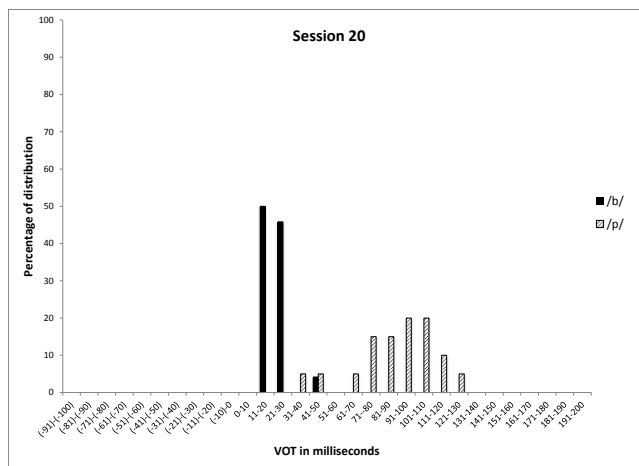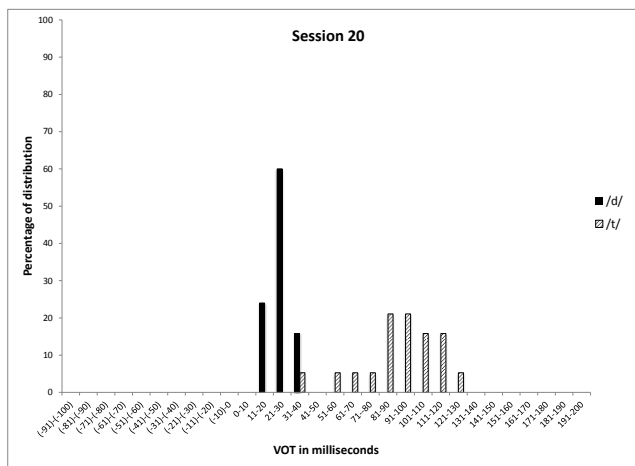

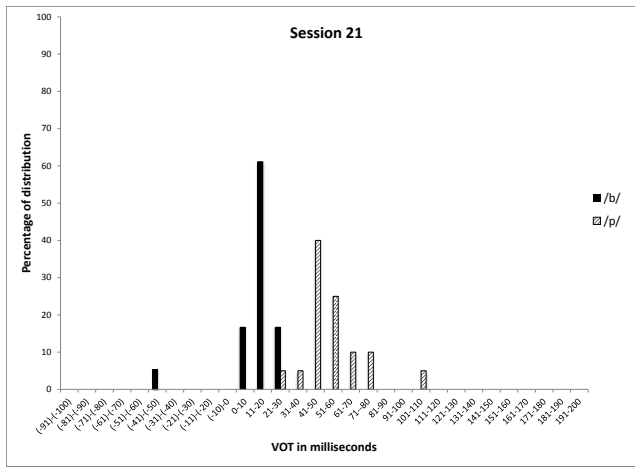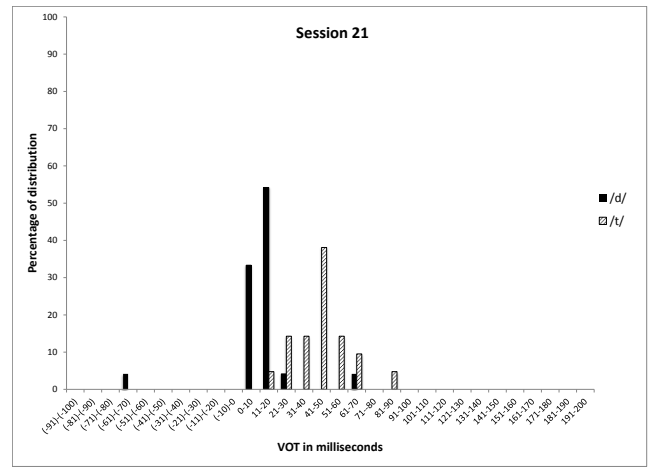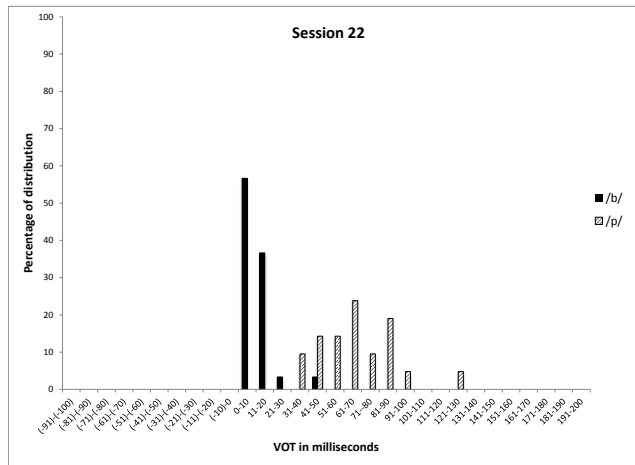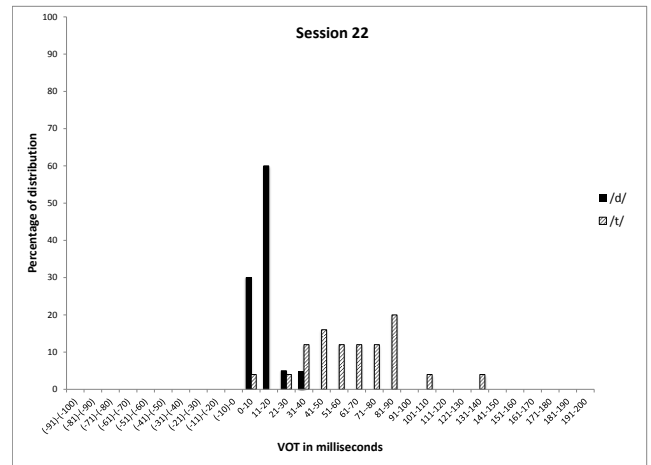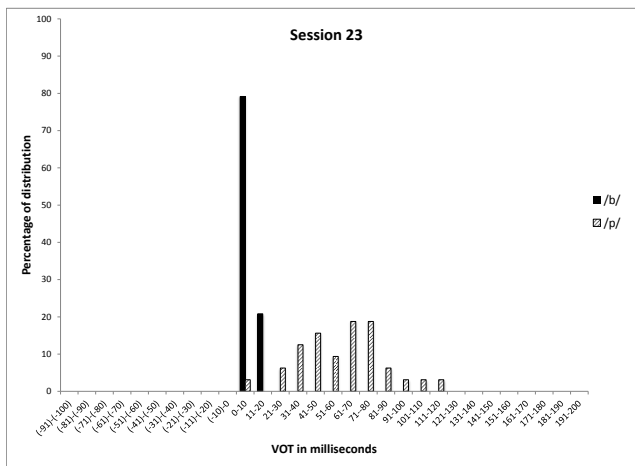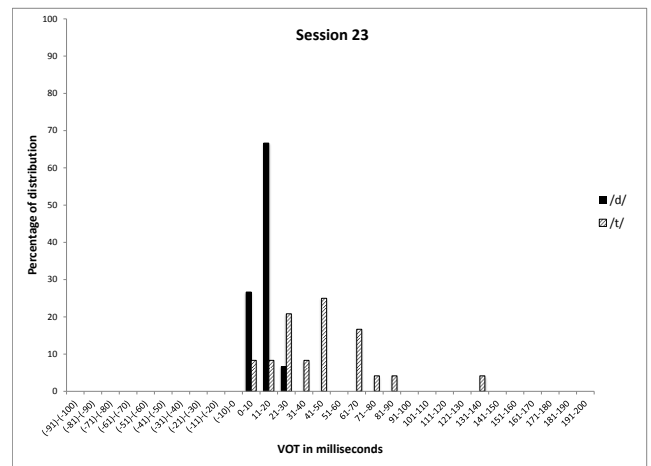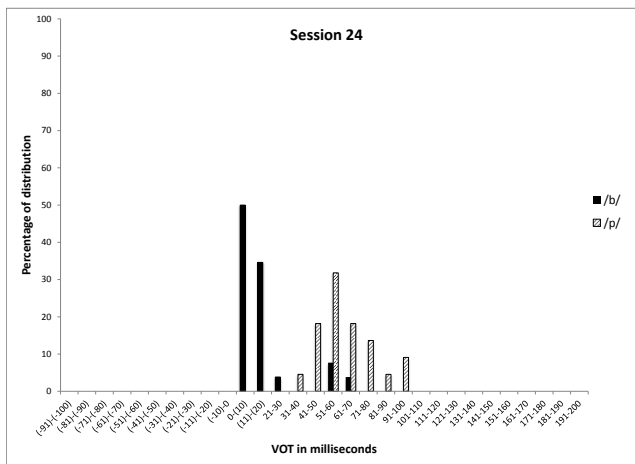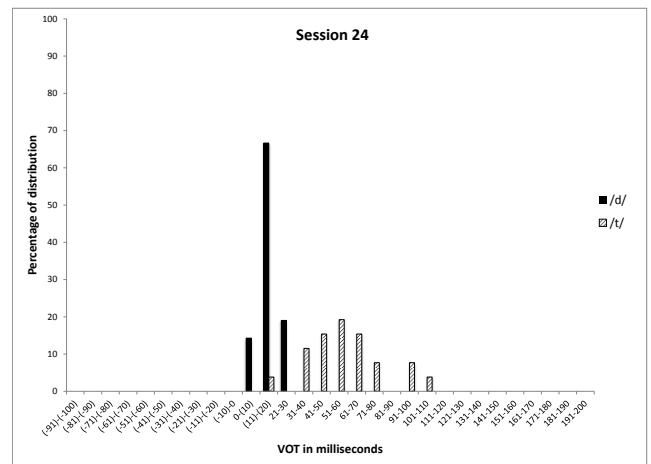

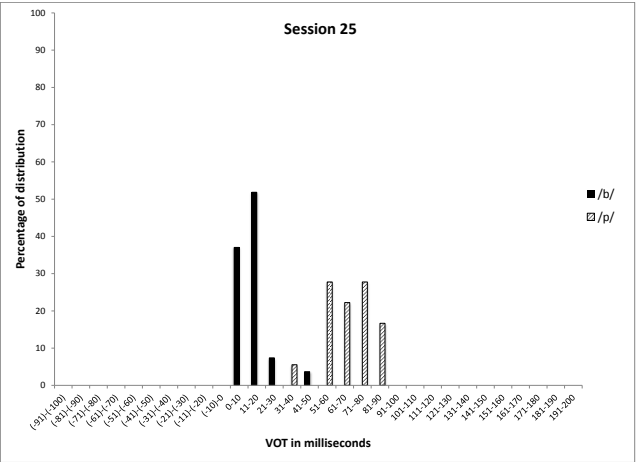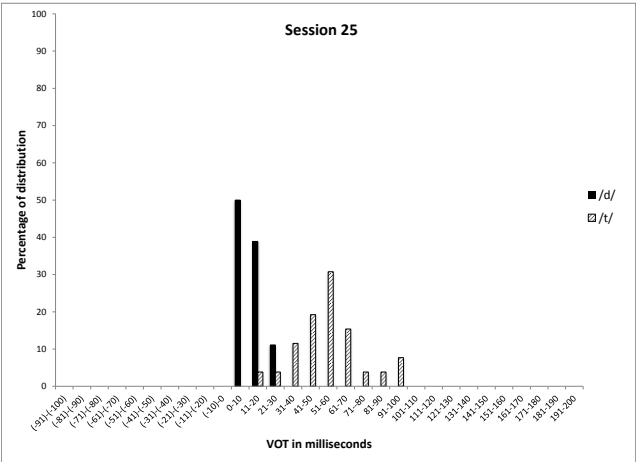

Supplement: Supplementary file 1 [file 2]

# Supplemental Histograms

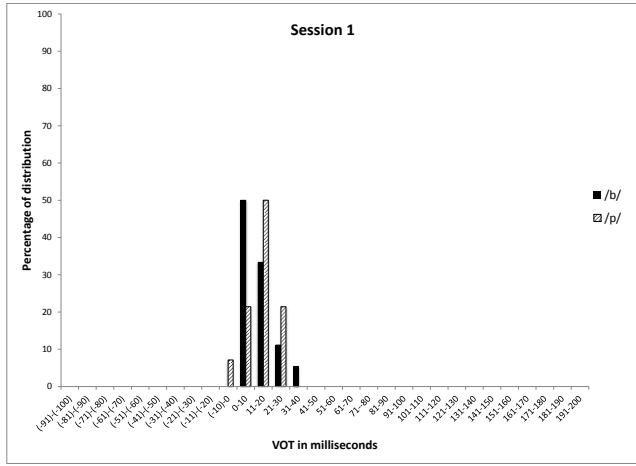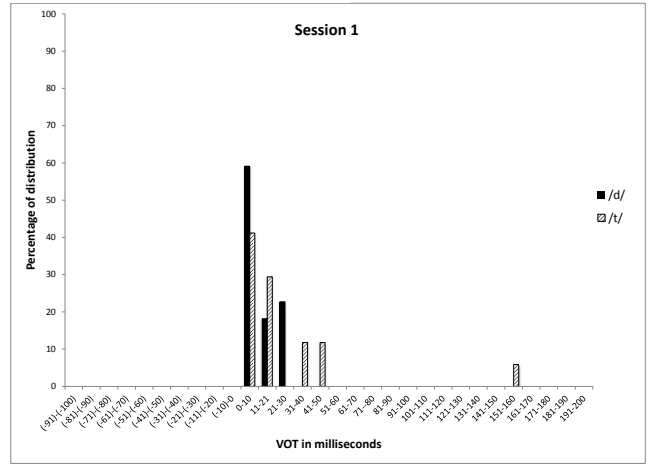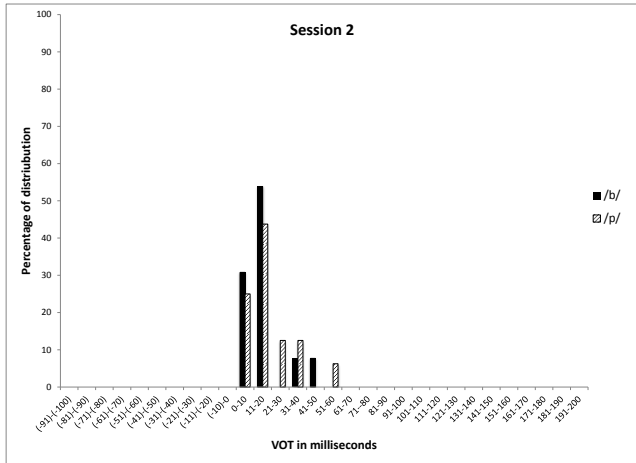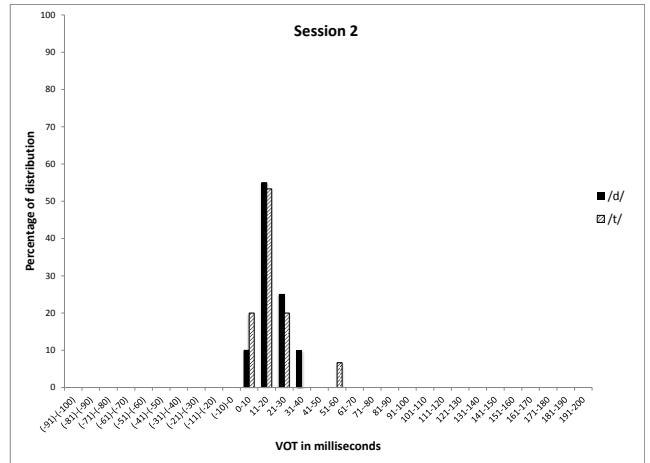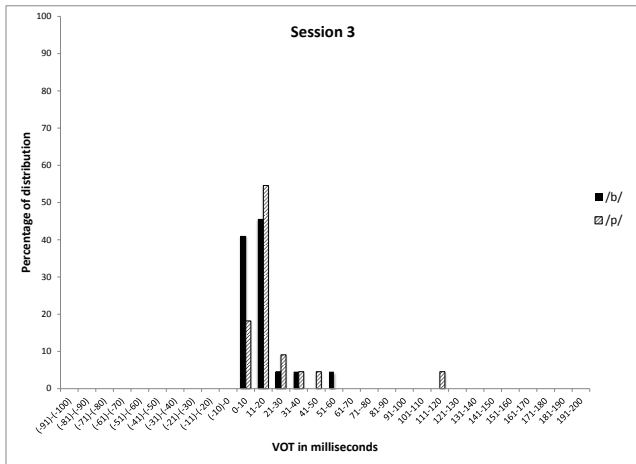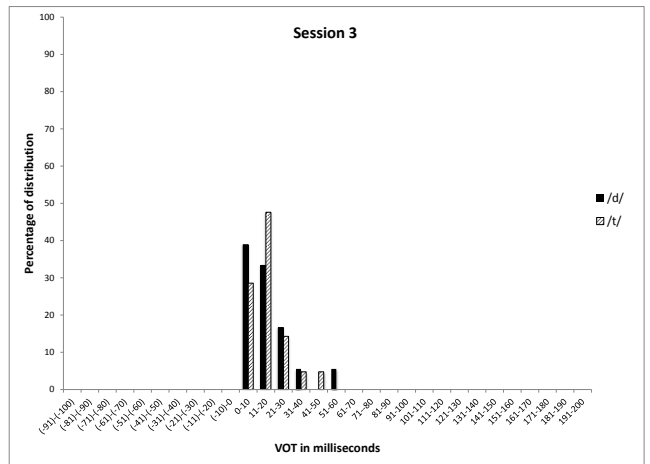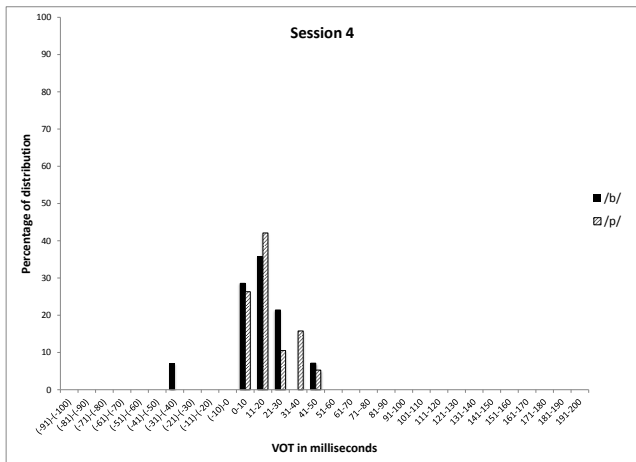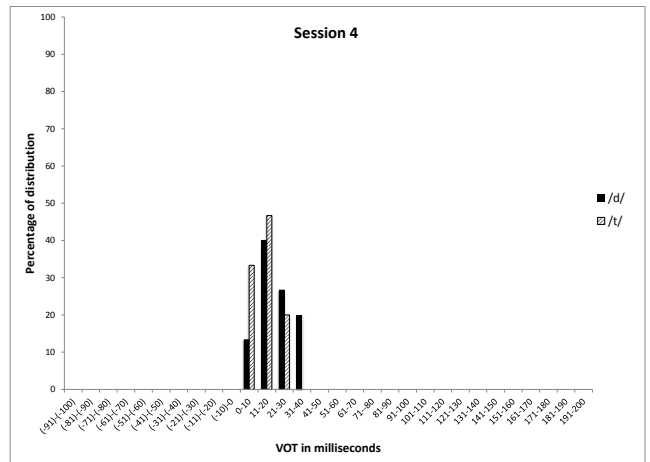

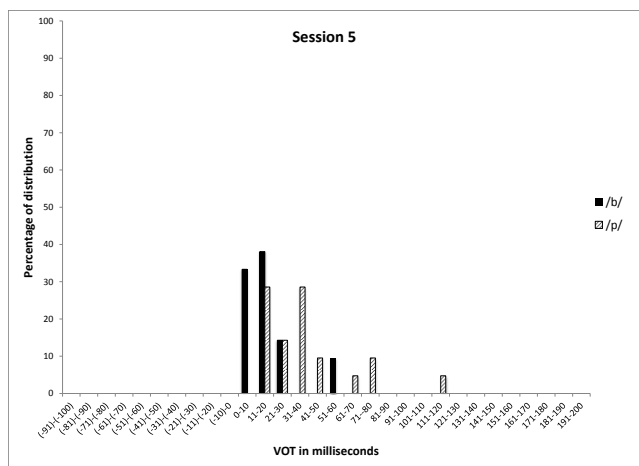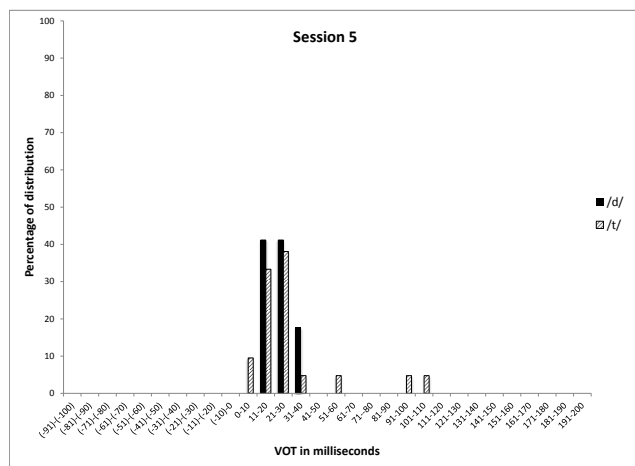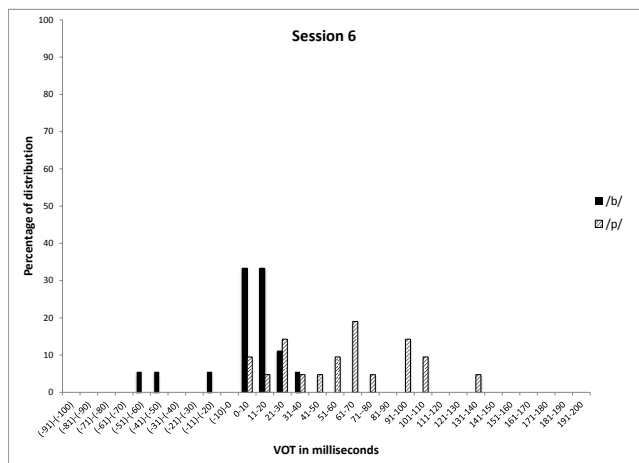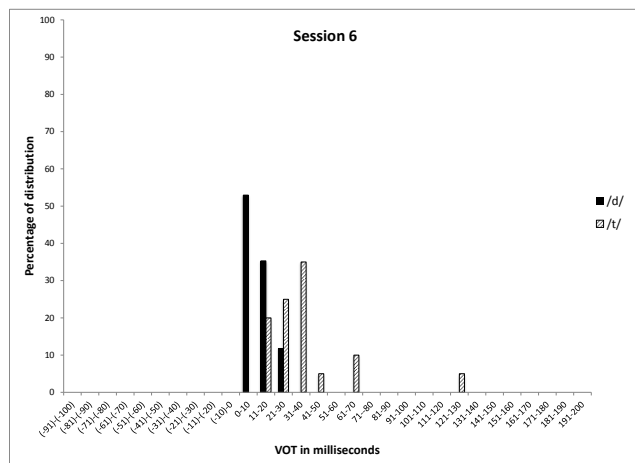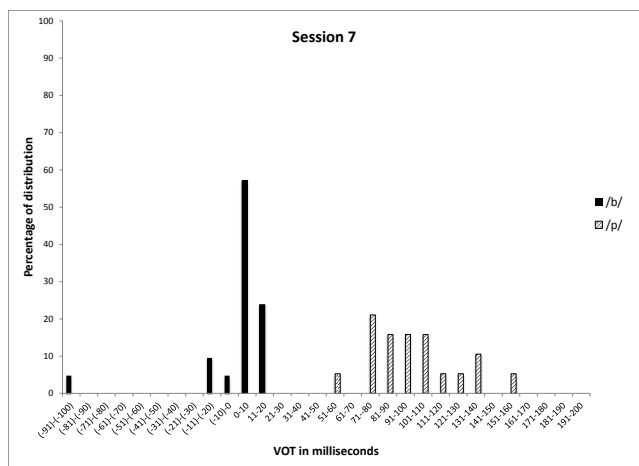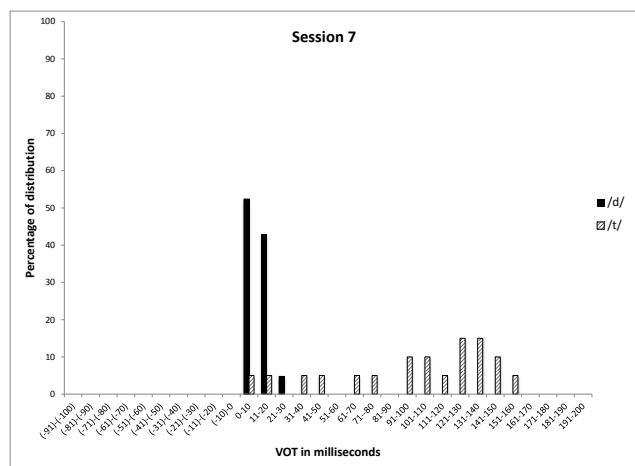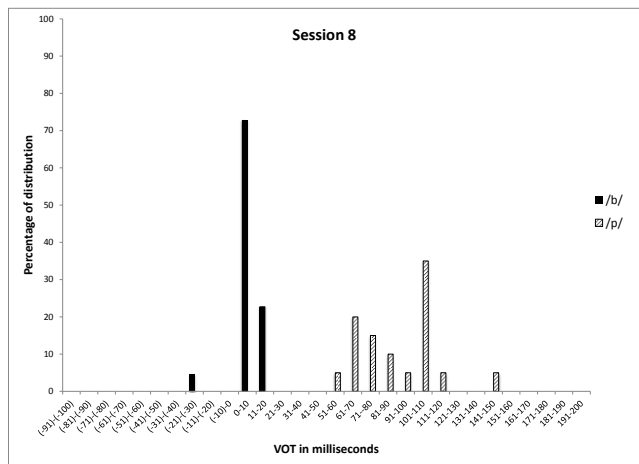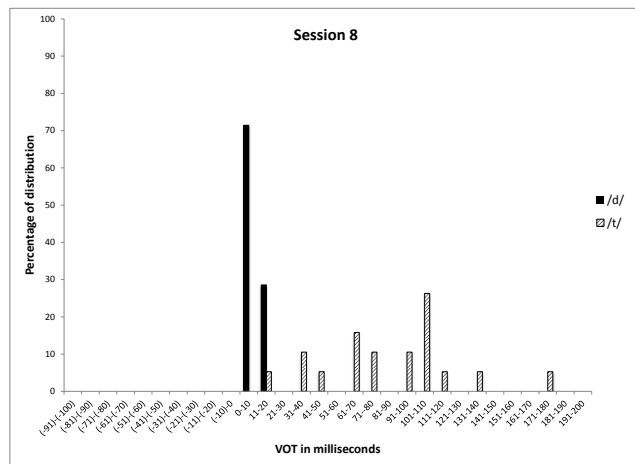

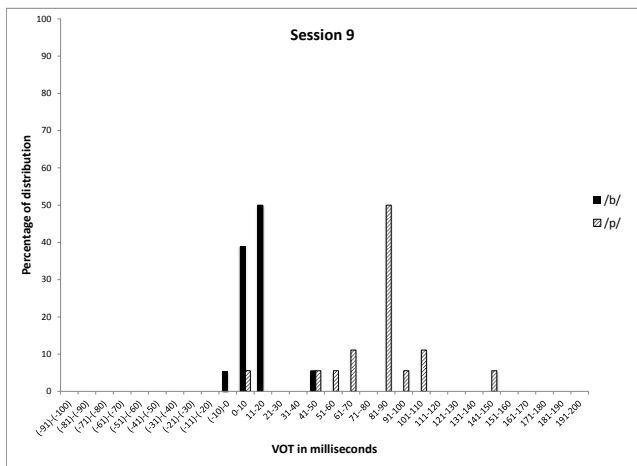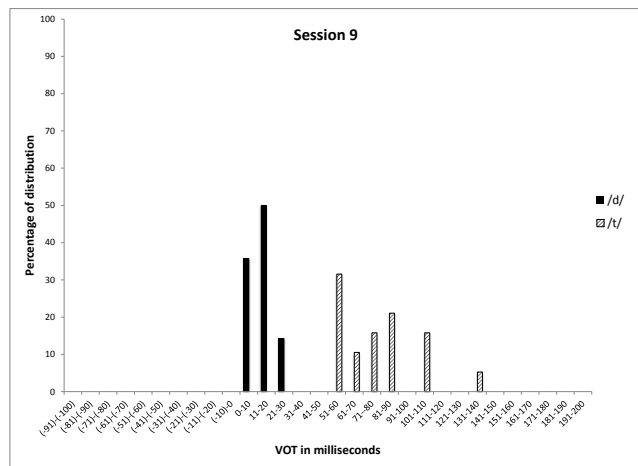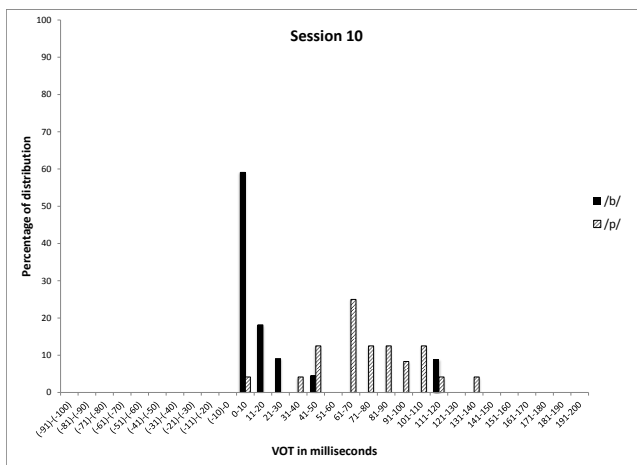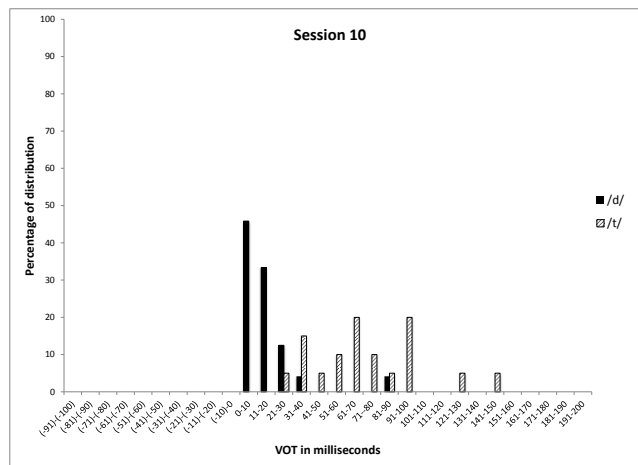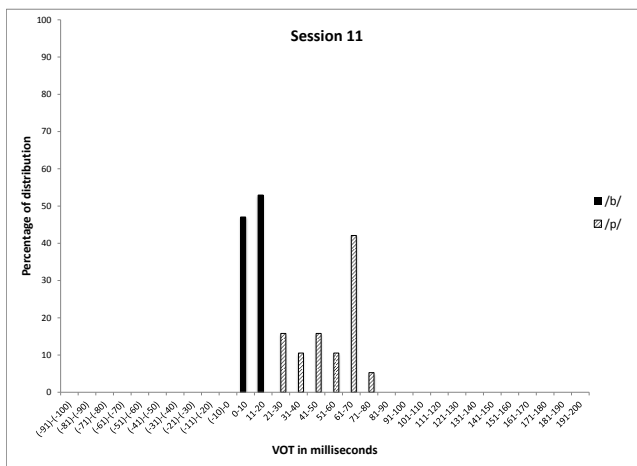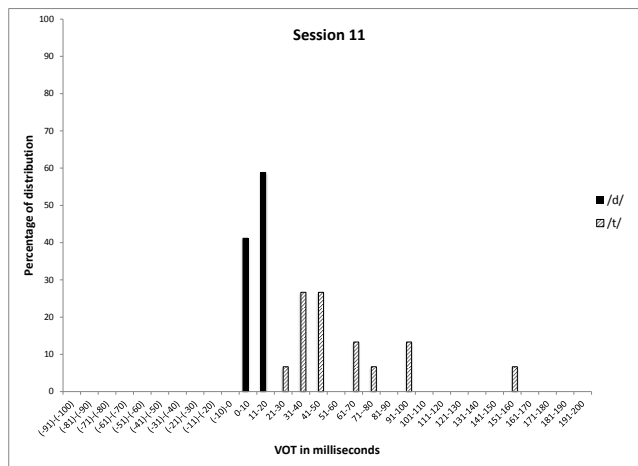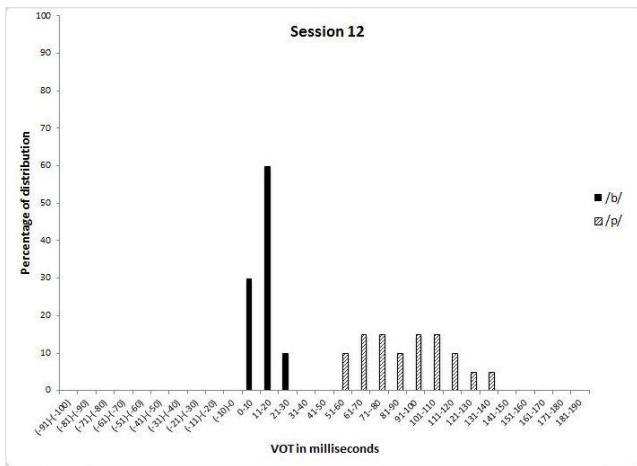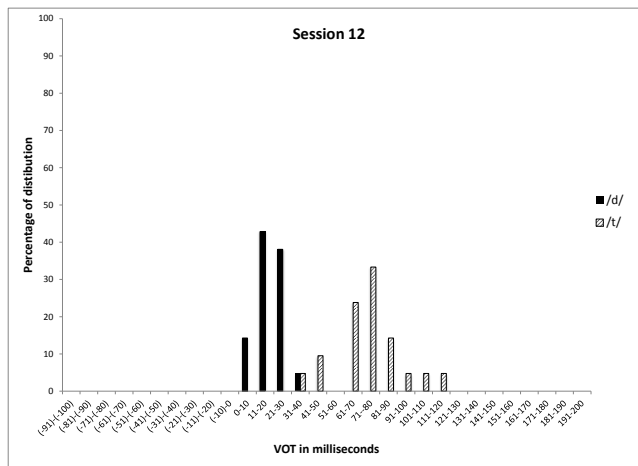



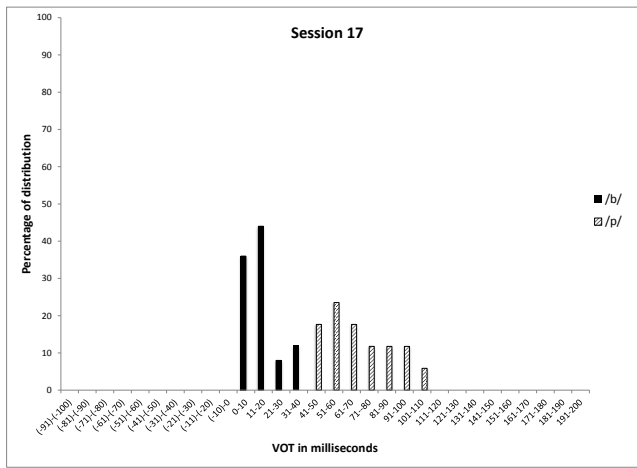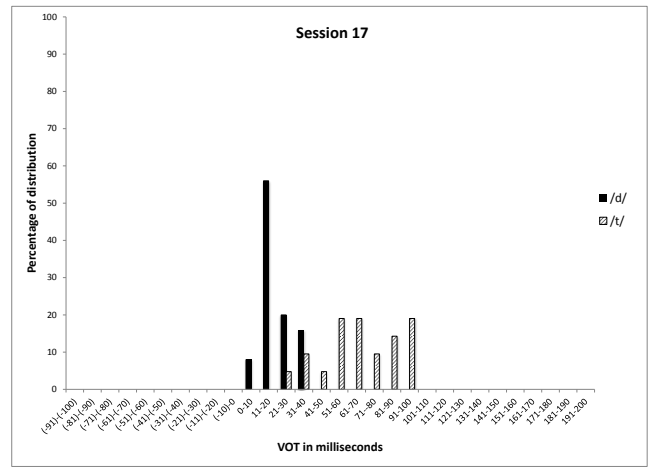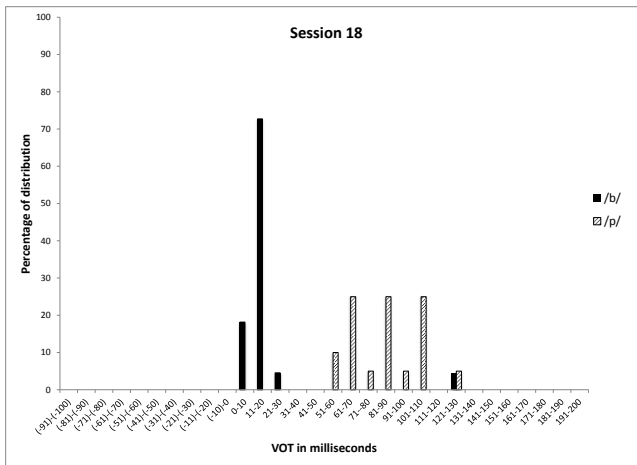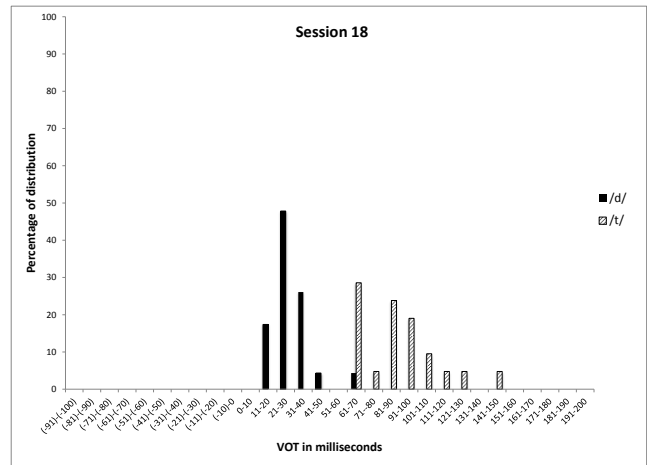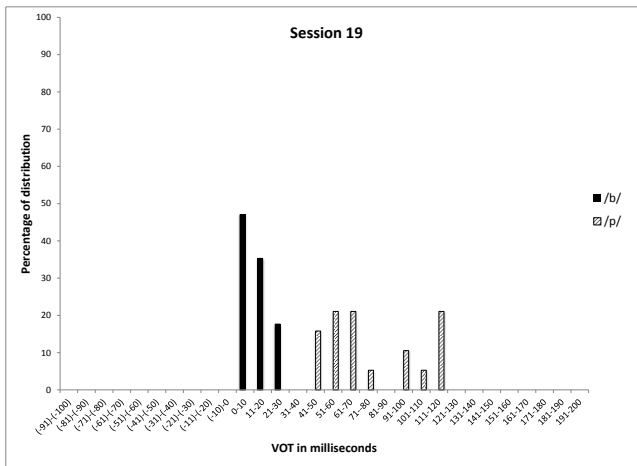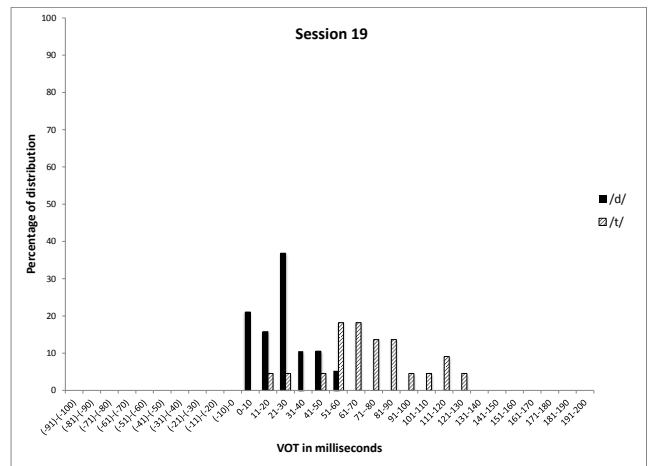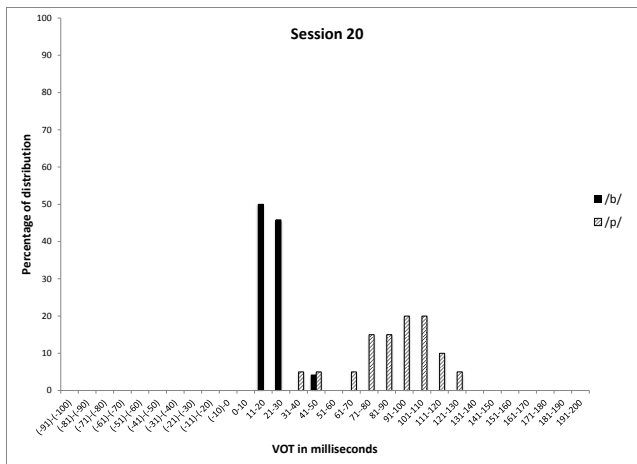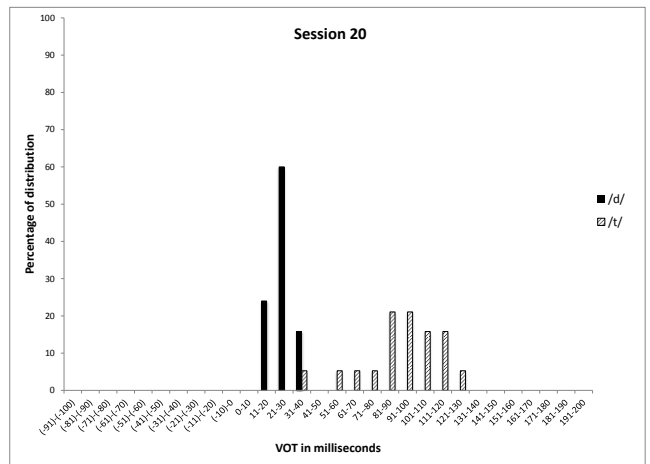



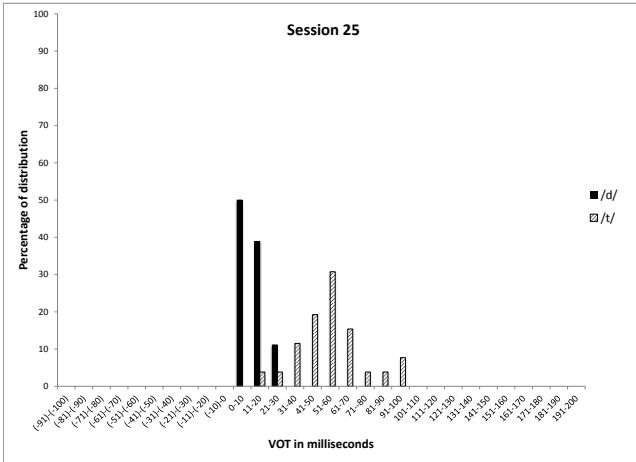

Supplement: Supplementary file 2 [file 2]
